# Supplementary material
Source: Springer Nature journal article supplement (https://www.springermedizin.de/resource/supplementary/12865_2009_298_MOESM6_ESM.pdf/9427698)

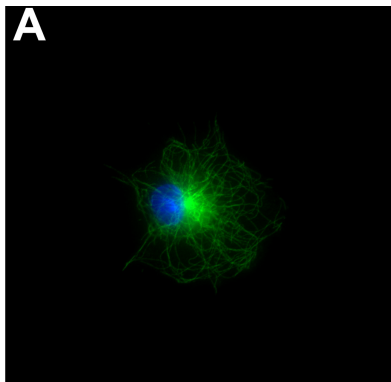

**Untreated**

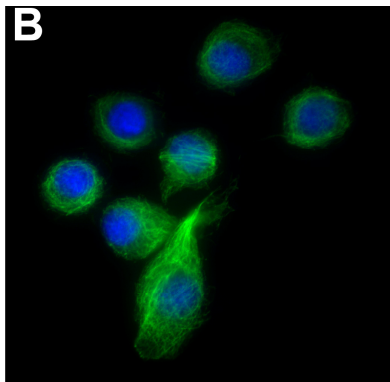

**Paclitaxel (1  $\mu$ M)**

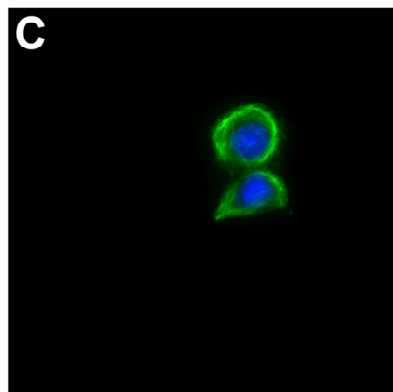

**Paclitaxel (100  $\mu$ M)**

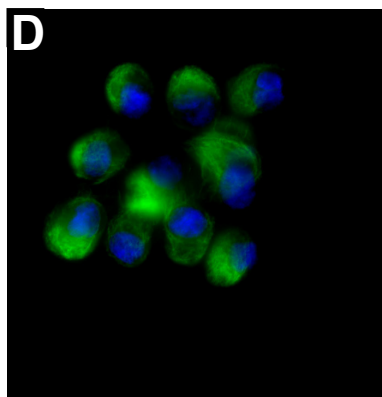

**LPS (1  $\mu$ g/ml)**

Supplement: MOESM6 [file 9427698]
